# Supplementary material for: A Model Predicting the Maximum Face Slab Deflection of Concrete-Face Rockfill Dams: Combining Improved Support Vector Machine and Threshold Regression
Source: MDPI journal article supplement (doi:10.3390/w15193474), 2023-10-02
Supplement: s1 [file s1]

Supporting information for

# **A Model Predicting the Maximum Face Slab Deflection of Concrete-Face Rockfill Dams: Combining Improved Support Vector Machine and Threshold Regression**

**Wei Zhao <sup>1,2</sup>, Zilong Wang<sup>1</sup>, Haiyang Zhang<sup>1</sup>, and Ting Wang <sup>1,\*</sup>**

<sup>1</sup> State Key Laboratory of Eco-hydraulics in Northwest Arid Region, Xi'an University of Technology, Xi'an 710048, China

<sup>2</sup> Shaanxi Province Institute of Water Resources and Electric Power Investigation and Design, Xi'an 710001, China

\* Correspondence: wting0307@xaut.edu.cn

## **Content**

**Table S1**

**Figures S1–S5**

**Text S1**

**Table S1.** Summary of Case History Data and Concrete Face Deformation Measurements of 71 In-Service CFRDs

| No. | Dams                 | Country     | Construction | H    | Foundation<br>and depth | IRS   | SF<br>(A/H2) | VR   | FD   |      | MP<br>(year) |
|-----|----------------------|-------------|--------------|------|-------------------------|-------|--------------|------|------|------|--------------|
|     |                      |             | Year         | (m)  |                         |       |              |      | (m)  | (%H) |              |
| 1   | Namgang              | Korea       | 2001         | 34   | R                       | -     | 36.2         | 0.27 | 0.06 | 0.17 | 6            |
| 2   | LiangHui             | China       | 1997         | 35.4 | G, 25m                  | VH    | 8.8          | 0.23 | 0.06 | 0.17 | 8            |
| 3   | Meixi                | China       | 1998         | 41   | G, 30m                  | MH    | 22.2         | -    | 0.13 | 0.32 | 10           |
| 4   | White Spur           | Australia   | 1989         | 43   | R                       | VH    | 2.3          | 0.22 | 0.04 | 0.09 | 5.9          |
| 5   | Dongbok              | South Korea | 1985         | 44.7 | R                       | VH    | 3.5          | 0.27 | 0.04 | 0.09 | 7            |
| 6   | Tongjiezi            | China       | 1992         | 48   | G, 71m                  | VH    | -            | -    | 0.12 | 0.25 | 8            |
| 7   | Dahe                 | China       | 1998         | 50.8 | G, 37m                  | M     | 4.1          | 0.21 | 0.13 | 0.25 | 8            |
| 8   | Daegok               | South Korea | 2006         | 52   | R                       | VH    | 3.7          | 0.25 | 0.01 | 0.02 | 1            |
| 9   | Sungeikou            | China       | 2009         | 52.1 | G, 15.4m                | H     | 10.2         | 0.2  | 0.17 | 0.32 | 2            |
| 10  | Jangheung            | South Korea | 2005         | 53   | R                       | VH    | 10.7         | 0.28 | 0.03 | 0.06 | 1            |
| 11  | Pichi-Picun<br>Leufu | Argentina   | 1999         | 54   | G, 28m                  | M     | 9.1          | 0.19 | 0.16 | 0.3  | 8            |
| 12  | Hanpinzui            | China       | 2006         | 57   | G, 45m                  | VH    | 4            | 0.22 | 0.13 | 0.23 | 5            |
| 13  | Longxi               | China       | 1990         | 58.9 | G                       | VH    | 2.4          | 0.33 | 0.19 | 0.32 | 7            |
| 14  | Yongdam              | South Korea | 2001         | 70   | R                       | MH    | 8.8          | 0.32 | 0.01 | 0.01 | 6            |
| 15  | Hengshan<br>Dam      | China       | 2006         | 70.2 | G, 72.3m                | MH    | 2.9          | 0.23 | 0.18 | 0.25 | 5            |
| 16  | Sancheong (L)        | South Korea | 2002         | 70.9 | R                       | VH    | 6.3          | 0.27 | 0.01 | 0.01 | 6            |
| 17  | Cheng ping           | China       | 1989         | 74.6 | R                       | VH    | 2.8          | 0.28 | 0.19 | 0.25 | 10           |
| 18  | Bastyan              | Australia   | 1983         | 75   | R                       | VH    | 3.4          | 0.23 | 0.07 | 0.09 | 9            |
| 19  | Mackintosh           | Australia   | 1981         | 75   | R                       | M-MH  | 4.9          | 0.24 | 0.49 | 0.65 | 19           |
| 20  | Pushi River          | China       | 2012         | 78.5 | R                       | VH    | 3.8          | 0.22 | 0.12 | 0.15 | 2            |
| 21  | Zeya                 | China       | 1998         | 78.8 | R                       | M-MH  | 3.7          | 0.25 | 0.14 | 0.18 | 15           |
| 22  | Mangrove<br>creek    | Australia   | 1981         | 80   | R                       | MH    | 4.5          | 0.26 | 0.1  | 0.13 | 4            |
| 23  | Crotty               | Australia   | 1990         | 83   | R                       | VH    | 1.9          | 0.2  | 0.05 | 0.06 | 9            |
| 24  | Cokal                | Turkey      | 2010         | 83   | R                       | MH    | 6.2          | 0.2  | 0.15 | 0.18 | 2            |
| 25  | Puclaro              | Chile       | 1999         | 83   | G, 113m                 | M     | 2.4          | 0.2  | 0.12 | 0.14 | 5            |
| 26  | Sugaroaf             | Australia   | 1979         | 85   | R                       | MH    | 11.5         | 0.3  | 0.16 | 0.19 | 15           |
| 27  | Sancheong (U)        | South Korea | 2002         | 86.9 | R                       | VH    | 3.1          | 0.27 | 0.01 | 0.01 | 6            |
| 28  | Miryang              | South Korea | 2001         | 89   | R                       | -     | 6.8          | 0.18 | 0.16 | 0.18 | 6            |
| 29  | Kotmale              | Sri Lanka   | 1984         | 90   | R                       | MH-VH | 7.4          | 0.27 | 0.1  | 0.11 | 2.5          |
| 30  | Daao                 | China       | 1999         | 90.2 | R                       | MH    | 3.6          | 0.21 | 0.23 | 0.25 | 8            |
| 31  | Wananxi              | China       | 1995         | 93.8 | R                       | MH    | 2            | 0.26 | 0.1  | 0.11 | 5            |
| 32  | Murchison            | Australia   | 1982         | 94   | R                       | VH    | 1.9          | 0.23 | 0.09 | 0.1  | 18           |
| 33  | Xibeikou             | China       | 1989         | 95   | R                       | MH-VH | 3.3          | 0.28 | 0.08 | 0.08 | 6            |
| 34  | Panshitou            | China       | 2004         | 101  | G                       | MH    | 6            | 0.22 | 0.34 | 0.34 | 5            |
| 35  | Nalan                | China       | 2005         | 109  | G, 24.3m                | MH    | 2.9          | 0.19 | 0.16 | 0.15 | 6            |
| 36  | Cethana              | Australia   | 1971         | 110  | R                       | VH    | 2.5          | 0.26 | 0.17 | 0.16 | 30           |

| No. | Dams              | Country   | Construction | H     | Foundation | IRS       | SF   | VR   | FD   | MP   |     |
|-----|-------------------|-----------|--------------|-------|------------|-----------|------|------|------|------|-----|
| 37  | Glevarad          | Iran      | 2012         | 110   | R          | VH        | -    | 0.25 | 0.25 | 0.23 | 3   |
| 38  | Chahan<br>wushu   | China     | 2009         | 110   | G, 46.7m   | VH        | 3.7  | 0.17 | 0.3  | 0.27 | 2   |
| 39  | Miaojia Dam       | China     | 2011         | 110   | G, 48m     | VH        | 2.5  | 0.2  | 0.3  | 0.27 | 1   |
| 40  | Duonuo            | China     | 2012         | 112.5 | G, 35m     | VH        | 2.2  | 0.21 | 0.23 | 0.2  | 2   |
| 41  | Khao Laem         | Thailand  | 1984         | 113   | R          | MH        | 8.3  | 0.29 | 0.13 | 0.12 | 14  |
| 42  | Turimiquire       | Venezuela | 1982         | 115   | R          | MH        | 2.7  | 0.32 | 0.25 | 0.22 | 5   |
| 43  | Potrerrillos      | Argentina | 2003         | 116   | G, 35m     | VH        | 3.1  | 0.21 | 0.3  | 0.26 | 6   |
| 44  | Lower<br>Pieman   | Australia | 1986         | 122   | R          | M         | 2.5  | 0.24 | 0.27 | 0.22 | 15  |
| 45  | Reece             | Australia | 1986         | 122   | G          | VH        | -    | 0.24 | 0.26 | 0.21 | 15  |
| 46  | Shiroro           | Nigeria   | 1984         | 125   | R          | VH        | 4.2  | 0.2  | 0.09 | 0.07 | 1.8 |
| 47  | Cirata            | Indonesia | 1988         | 125   | R          | M-MH      | 3.9  | 0.24 | 0.35 | 0.28 | 10  |
| 48  | Ita               | Brazil    | 1999         | 125   | R          | MH-<br>VH | 7    | 0.31 | 0.51 | 0.41 | 4   |
| 49  | Golillas          | Colombia  | 1978         | 127   | R          | VH        | 0.9  | 0.24 | 0.16 | 0.13 | 7   |
| 50  | Yinduzzi          | China     | 2004         | 129.5 | R          | MH-<br>VH | 2.1  | 0.21 | 0.2  | 0.15 | 5   |
| 51  | Shanxi            | China     | 2000         | 132.5 | G, 24m     | VH        | 3.4  | 0.2  | 0.2  | 0.15 | 6   |
| 52  | Jiudianxia        | China     | 2008         | 136   | G, 56m     | VH        | 2    | 0.17 | 0.84 | 0.62 | 3   |
| 53  | Los Caracoles     | Argentina | 2009         | 136   | G, 28m     | MH        | 4.5  | 0.23 | 0.41 | 0.3  | 4   |
| 54  | Alto<br>Anchicaya | Colombia  | 1974         | 140   | G, 34m     | VH        | 1.1  | 0.22 | 0.16 | 0.11 | 10  |
| 55  | Segredo           | Brazil    | 1993         | 145   | R          | MH-VH     | 4.1  | 0.37 | 0.34 | 0.23 | 8   |
| 56  | Salva<br>Hingna   | Venezuela | 2002         | 148   | R          | VH        | 2.45 | 0.33 | 0.1  | 0.07 | 13  |
| 57  | Dongqin           | China     | 2009         | 149.5 | R          | VH        | 3.7  | 0.19 | 0.6  | 0.4  | 3   |
| 58  | Mesochora         | Greece    | 1995         | 150   | R          | M         | 1.6  | 0.23 | 0.33 | 0.22 | 5   |
| 59  | Xingo             | Brazil    | 1994         | 150   | R, G, 41m  | M-VH      | 6    | 0.28 | 0.51 | 0.34 | 6   |
| 60  | Malutang          | China     | 2009         | 154   | R          | VH        | 2.4  | 0.19 | 0.28 | 0.18 | 3   |
| 61  | Salvajina         | Colombia  | 1983         | 154   | G, R, 30m  | MH-VH     | 2.4  | 0.21 | 0.06 | 0.04 | 7.5 |
| 62  | Zipingou          | China     | 2006         | 156   | R          | VH        | 4.8  | 0.26 | 0.25 | 0.16 | 6   |
| 63  | Jilintai          | China     | 2006         | 157   | R          | VH        | 3.1  | 0.23 | 0.24 | 0.15 | 7   |
| 64  | Foz do Areia      | Brazil    | 1980         | 160   | R          | MH-VH     | 5.4  | 0.33 | 0.78 | 0.49 | 20  |
| 65  | Tankeng           | China     | 2008         | 162   | G, 30m     | VH        | 3.7  | -    | 0.17 | 0.1  | 5   |
| 66  | Tianshenqiao      | China     | 2000         | 178   | R          | M-VH      | 4.9  | 0.31 | 1.14 | 0.64 | 1.5 |
| 67  | Hongjiadu         | China     | 2005         | 179.5 | R          | VH        | 2.4  | 0.2  | 0.35 | 0.19 | 6   |
| 68  | Sanbanxi          | China     | 2007         | 185   | R          | MH        | 2.5  | 0.22 | 0.17 | 0.1  | 5   |
| 69  | Aguamilpa         | Mexico    | 1993         | 187   | R, G       | VH        | 3.9  | 0.18 | 0.32 | 0.17 | 7   |
| 70  | Bakun             | Malaysia  | 2007         | 205   | R          | VH        | 2.8  | 0.2  | 0.8  | 0.39 | 4   |
| 71  | Shuibuya          | China     | 2007         | 233   | R          | VH        | 2.3  | 0.22 | 0.28 | 0.12 | 3   |

Note: H is the dam height; G is the alluvium foundation; R is the rock foundation; IRS is the classification of intact rockfill strength; VH, MH, and M are the unconfined saturation compressive strength of 70–240, 20–70, and 6–20 MPa, respectively; VR is the void ratio; SF is the valley shape factor ( $A/H^2$ ); A is the upstream slope surface area; FD is the the dam maximum face slab deflection at the measuring time;  $FD(\%H)$  is the dam maximum face slab deflection index  $FD/H$ ; and MP is the measurement period (the time interval between the completion of the reservoir filling and the measurement time of the deformation).

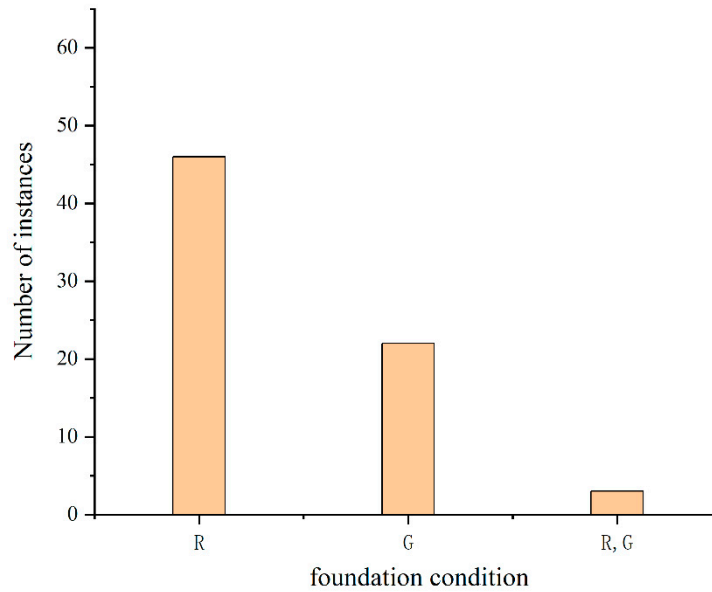

**Figure S1. (newly added)** Foundation condition statistics

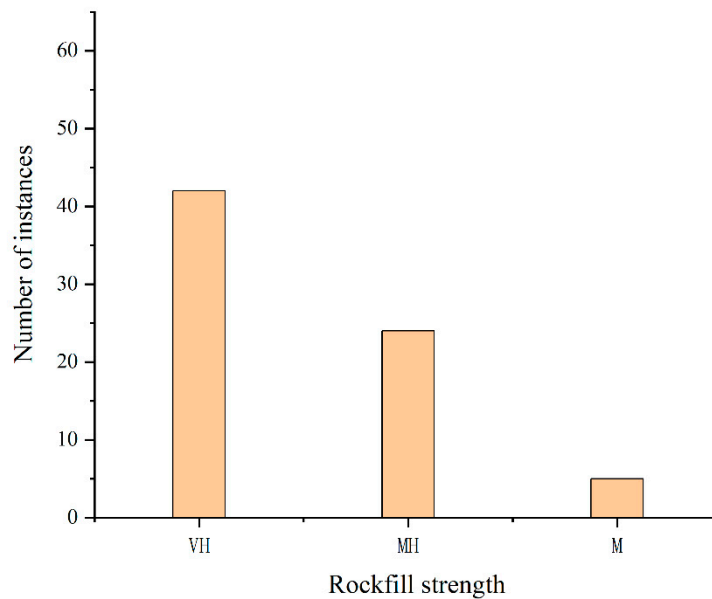

**Figure S2. (newly added)** Rockfill strength statistics

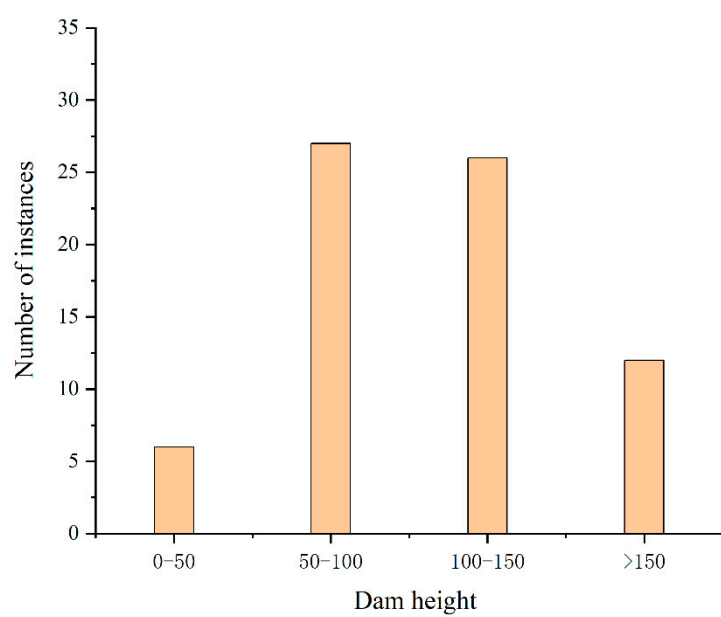

**Figure S3. (newly added)** Dam height statistics

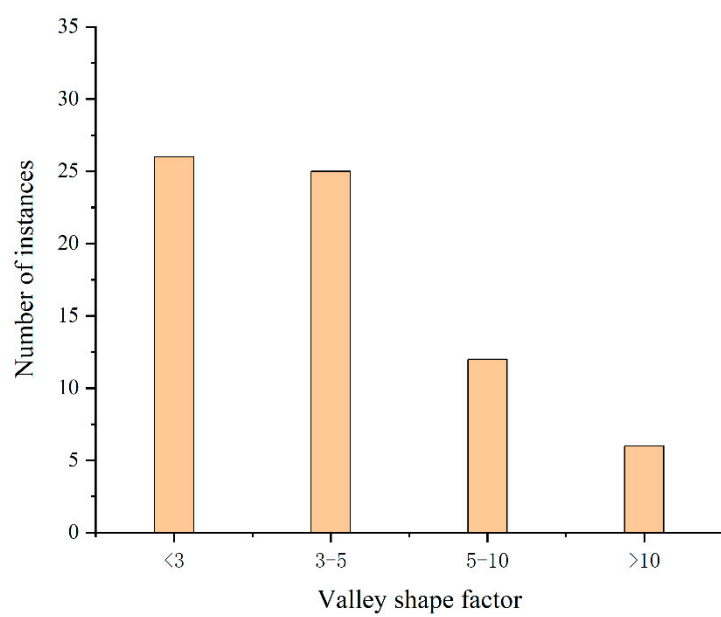

**Figure S4. (newly added)** Valley shape factor statistics

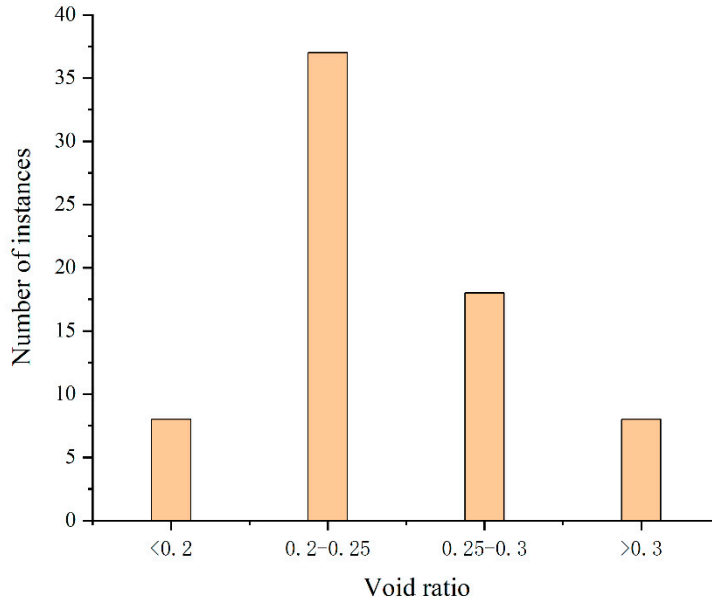

**Figure S5. (newly added)** Void ratio statistics

Text S1. (newly added) The basic theory of PSO

The basic theory of PSO is the iteration of random particle (random solution) to find the optimal solution. The particle updates its vi velocity and xi position using the following formula:

$$v_{id}^{t+1} = \omega \cdot v_{id}^t + c_1 r_1 (P_{bestid}^t - x_{id}^t) + c_2 r_2 (g_{bestid}^t - x_{id}^t) \quad (3-9)$$

$$x_{id}^{t+1} = x_{id}^t + v_{id}^t \quad (3-10)$$

where:

$t$ — Number of iterations;

$\omega$ —inertia factor;

$c_1, c_2$ —learning factor;

$r_1, r_2$ —random number within [0,1]

is the iteration of random particle (random solution) to find the optimal solution. The particle updates its vi velocity and xi position using the following formula:

$$v_{id}^{t+1} = \omega \cdot v_{id}^t + c_1 r_1 (P_{bestid}^t - x_{id}^t) + c_2 r_2 (g_{bestid}^t - x_{id}^t) \quad (3-9)$$

$$x_{id}^{t+1} = x_{id}^t + v_{id}^t \quad (3-10)$$

where:

$t$ — Number of iterations;

$\omega$ —inertia factor;

$c_1, c_2$ —learning factor;

$r_1, r_2$ —random number within  $[0,1]$
